# Supplementary material
Source: Springer Nature journal article supplement (https://www.springermedizin.de/resource/supplementary/12990_2007_109_MOESM5_ESM.pdf/9612586)

HEK293: TRPV1/ET<sub>A</sub>

A

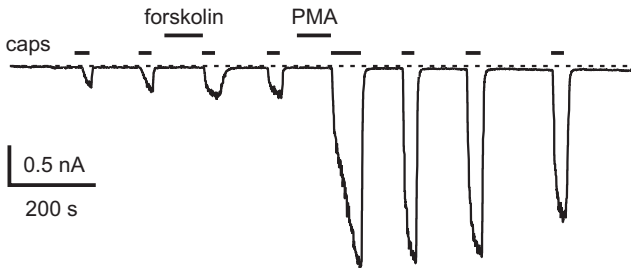

B

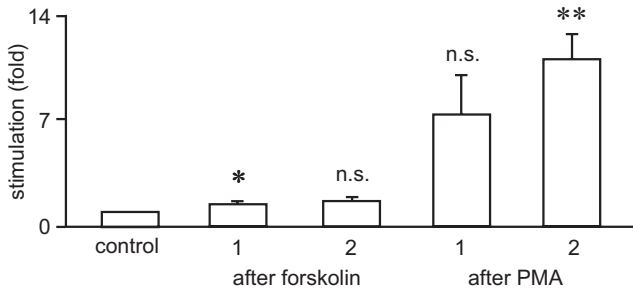

Supplement: MOESM5 [file 9612586]
